# Supplementary material for: Electro-conversion of cumene into acetophenone using boron-doped diamond electrodes
Source: publisher site journal article supplement (doi:10.3762/bjoc.18.119), 2022-09-07
Supplement: Additional file 1 [file 1860-5397-18-119-S1.pdf]

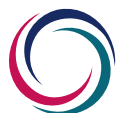

## Supporting Information

for

### **Electro-conversion of cumene into acetophenone using boron-doped diamond electrodes**

Mana Kitano, Tsuyoshi Saitoh, Shigeru Nishiyama, Yasuaki Einaga  
and Takashi Yamamoto

*Beilstein J. Org. Chem.* **2022**, 18, 1154–1158. doi:10.3762/bjoc.18.119

### **Characterization data and $^1\text{H}$ NMR spectra of isolated compounds 2, 3, 4, and 5**

# Characterization data and $^1\text{H}$ NMR spectra of isolated compounds

## Cumene hydroperoxide (2)

$^1\text{H}$  NMR (400 MHz,  $\text{CDCl}_3$ ):  $\delta$  7.49–7.24 (m, 5H), 1.62 (s, 6H).

The spectral data agreed with the literature [S1].

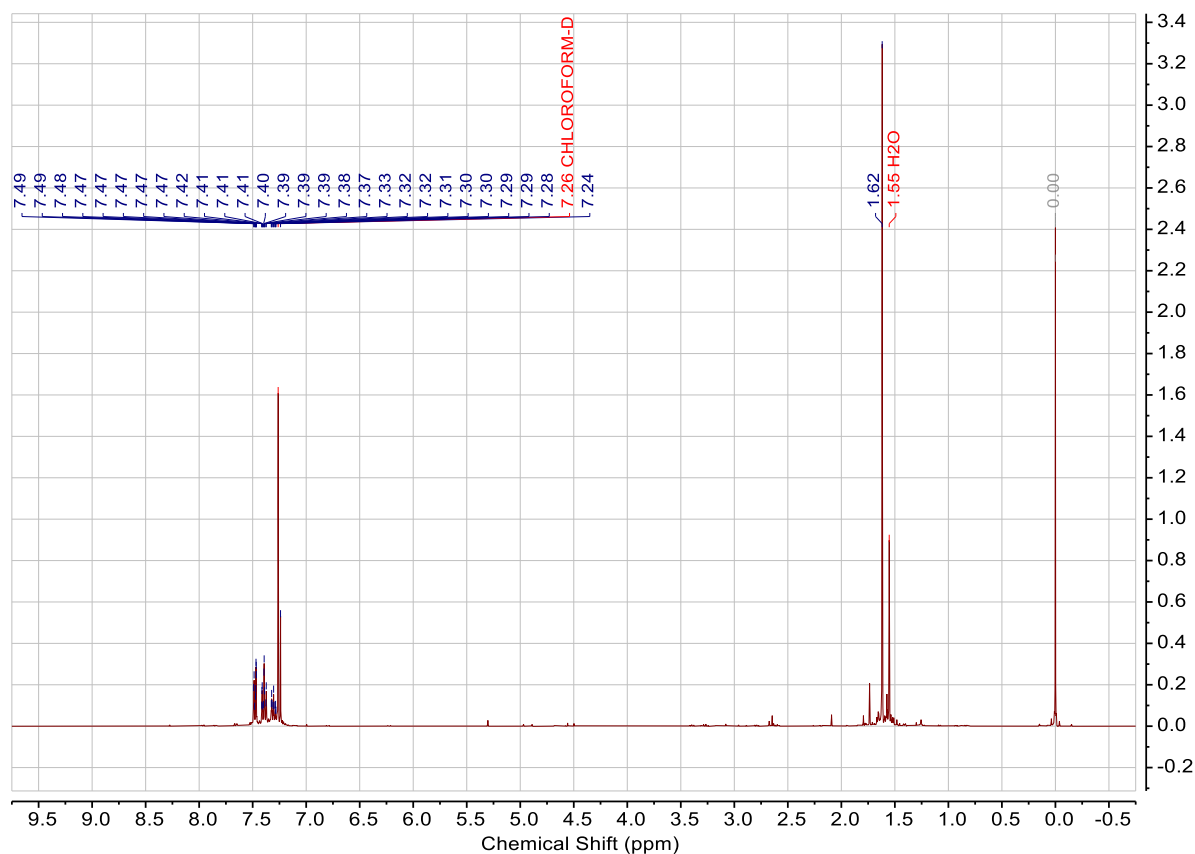

**Figure S1:**  $^1\text{H}$  NMR spectrum of cumene hydroperoxide (2).

Acetophenone (3)

$^1\text{H}$  NMR (400 MHz,  $\text{CDCl}_3$ ):  $\delta$  7.97–7.44 (m, 5H), 2.61 (s, 3H).

The spectral data agreed with the literature [S1].

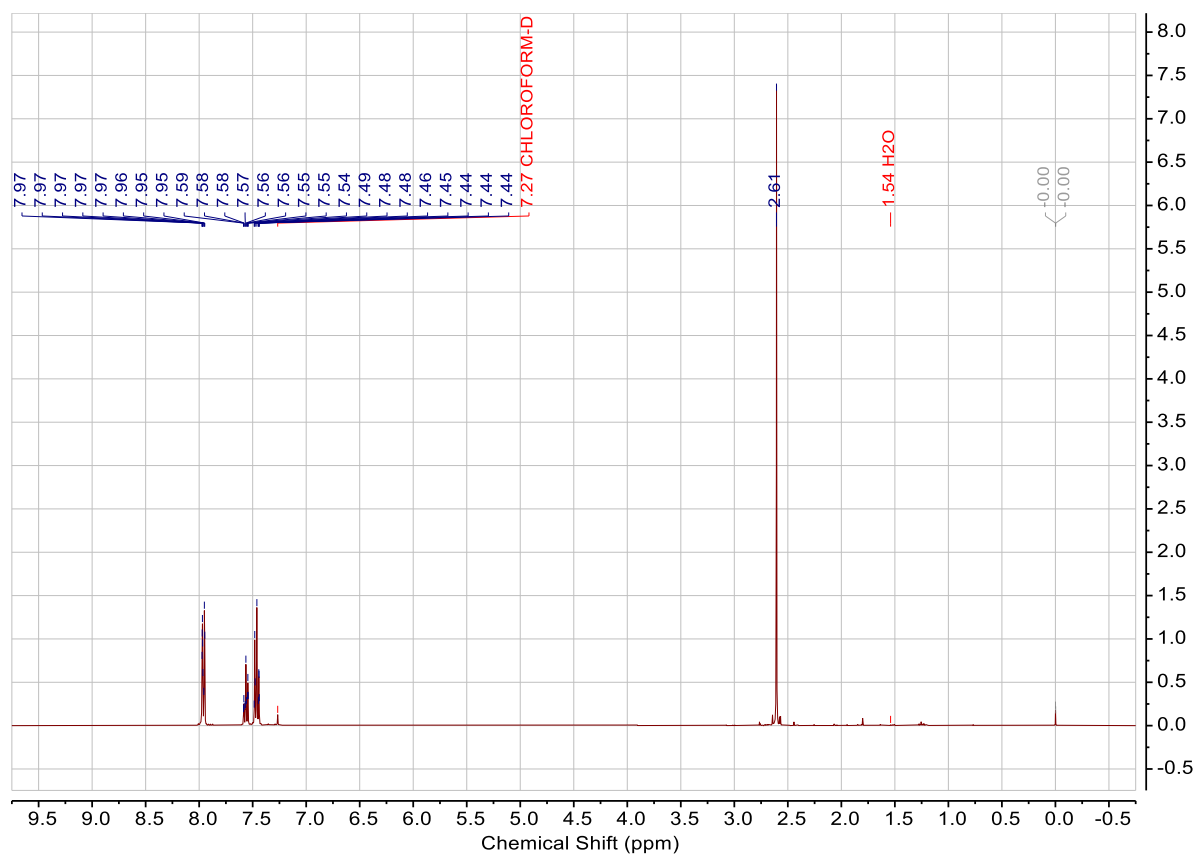

**Figure S2:**  $^1\text{H}$  NMR spectrum of acetophenone (3).

Cumyl alcohol (4)

$^1\text{H}$  NMR (400 MHz,  $\text{CDCl}_3$ ):  $\delta$  7.50–7.22 (m, 5H), 1.84 (s, 1H), 1.58 (s, 6H).

The spectral data agreed with the literature [S1].

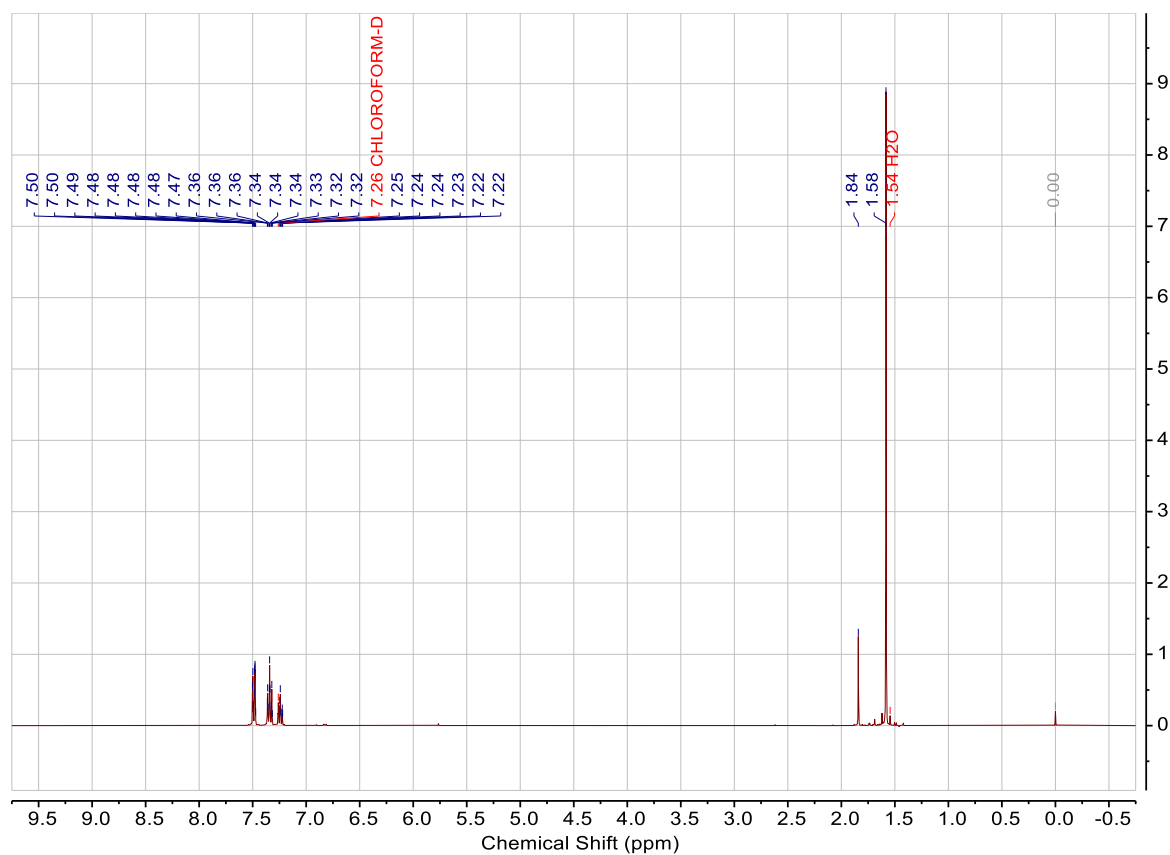

**Figure S3:**  $^1\text{H}$  NMR spectrum of cumyl alcohol (4).

### Methyl cumyl ether (5)

$^1\text{H}$  NMR (400 MHz,  $\text{CDCl}_3$ ):  $\delta$  7.48–7.22 (m, 5H), 3.07 (s, .3H), 1.53 (s, 6H).

The spectral data agreed with the literature [S2].

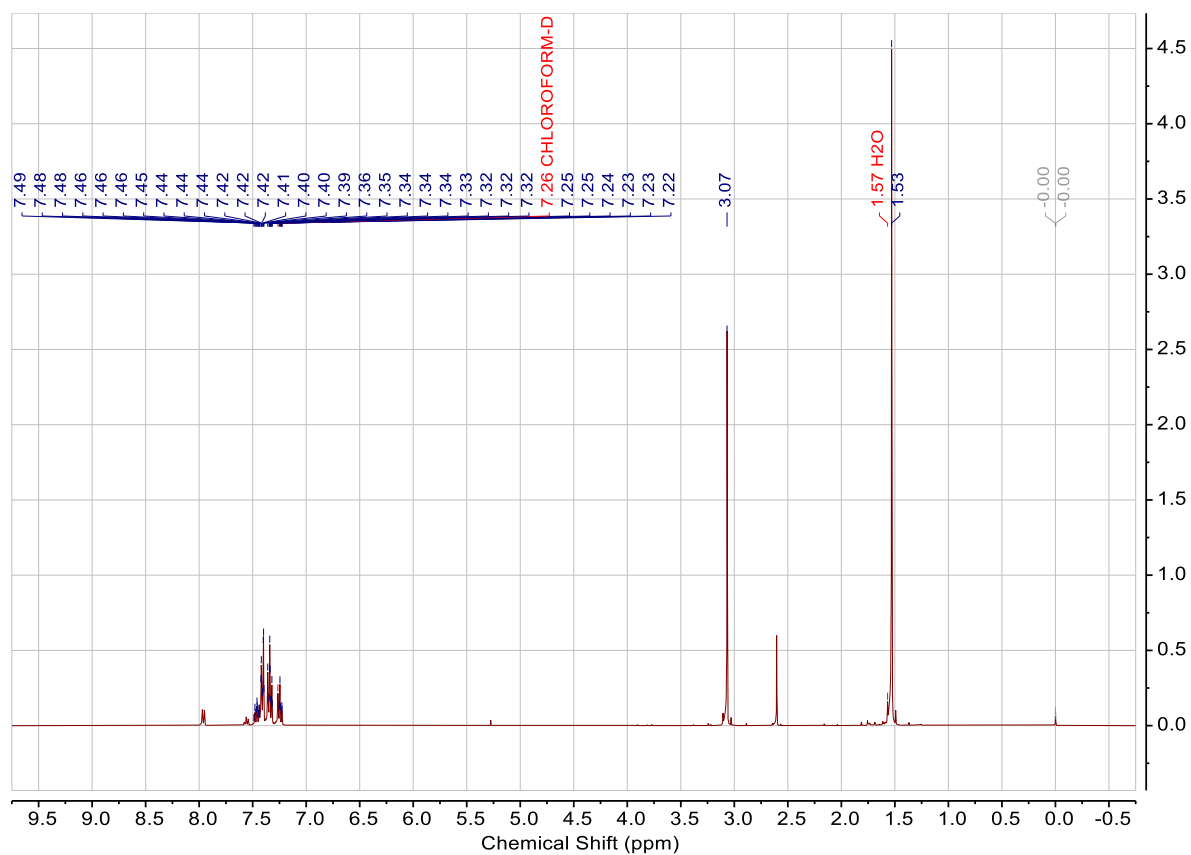

**Figure S4:**  $^1\text{H}$  NMR spectrum of methyl cumyl ether (5).

## References

- S1. The Aldrich FT-NMR library, Sigma-Aldrich Corp., 2003.
- S2. Murphy, J. A.; Khan, T. A.; Zhou, S.-Z.; Thomson, D. W.; Mahesh, M. *Angew. Chem. Int. Ed.* **2005**, *44*, 1356–1360.
